# Supplementary material for: Microwave and traditional solvothermal syntheses, crystal structures, mass spectrometry and magnetic properties of CoII4O4 cubes
Source: Royal Society of Chemistry journal article supplement (doi:10.1039/c3dt00121k), 2013-01-01
Supplement: c3dt00121k.pdf [file c3dt00121k.pdf]

# Supporting Information

## Microwave and traditional solvothermal syntheses, crystal structures, mass spectroscopy and magnetic properties of $\text{Co}^{\text{II}}_4\text{O}_4$ cubes

Kun Zhang,<sup>a</sup> Jun Dai,<sup>a</sup> Yun-Hong Wang,<sup>a</sup> Ming-Hua Zeng,<sup>\*a, b</sup> and Mohamedally Kurmoo<sup>\*c</sup>

<sup>a</sup> Key Laboratory of Synthetic and Natural Functional Molecule Chemistry of the Ministry of Education, Northwest University, Xi'an, 710069; P. R. China. <sup>b</sup> Department of Chemistry and Chemical Engineering, Guangxi Normal University, Key Laboratory for the Chemistry and Molecular Engineering of Medicinal Resources (Ministry of Education) Guilin, 541004, P. R. China. <sup>c</sup> Laboratoire DECOMET, Institut de Chimie de Strasbourg, Université de Strasbourg, CNRS-UMR 7177, 4 rue Blaise Pascal, CS 90032, 67081 Strasbourg Cedex, France

Figure S1. TG analysis of **2**.

Table S1. Selected bond lengths (Å) for **1** and **2**

Figure S2. Powder XRD patterns of **1** and **2**.

Figure S3. Packing of complex **1** and **2** in the crystal viewed along c axis with single plane.

Figure S4. Packing of complex **1** and **2** in the crystal viewed along c axis for two overlapping planes.

Figure S5. The diagrams of H-bonding interactions for **1** and **2**.

Figure S6. Photos of crystals of **1** for different reaction times by microwave assisted synthesis.

Table S2. Details of major species assigned to the peaks in the ESI-MS spectrum of the methanol solution of **1**.

Table S3. Details of major species assigned to the peaks in the ESI-MS spectrum of the ethanol solution of **1**.

Table S4. Details of major species assigned to the peaks in the ESI-MS spectrum of the methanol solution of **2**.

Table S5. Details of major species assigned to the peaks in the ESI-MS spectrum of the ethanol solution of **2**.

Figure S7. Representation of the calculated peaks fit experimental species present in the ESI-MS spectrum of the methanol solution of **1**.

Figure S8. Representation of the calculated peaks fit experimental species present in the ESI-MS spectrum of the ethanol solution of **1**.

Figure S9. Representation of the calculated peaks fit experimental species present in the ESI-MS spectrum of the methanol solution of **2**.

Figure S10. Representation of the calculated peaks fit experimental species present in the ESI-MS spectrum of the ethanol solution of **2**.

Figure S11. Plots of  $\chi_m^{-1}$  vs.  $T$  and the fit of Curie-Weiss law of **1** and **2** for different ranges of temperatures.

Figure S12. Plots of in-phase ( $\chi'$ ) and out-of-phase ( $\chi''$ ) ac susceptibilities for **1** and **2**.

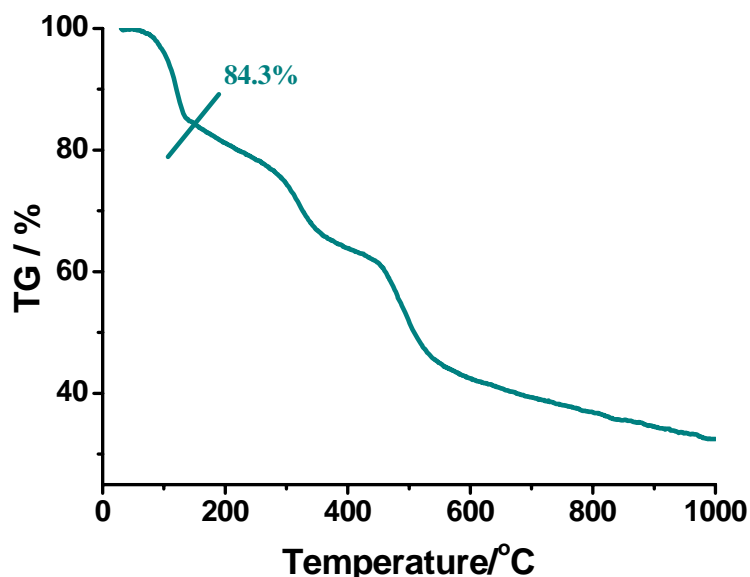

**Figure S1.** TG analysis was performed to confirm the presence of guest molecule in **2**: TG measurement under  $N_2$  atmosphere was performed by using a crushed ~~single~~-crystalline sample of **2** indicated loss of four terminal coordinated and two guest methanol molecules between 30 and 150 °C (15.7% mass loss observed, 15.8% calculated). Combined with the elemental analyses (see the experimental part) and the structural data, the final composition of **2** was determined as  $[Co_4(heb)_4(\mu_3-OMe)_4(MeOH)_4] \cdot 2MeOH$ .

**Table S1** Selected bond lengths (Å) and angles (°) for **1** and **2**

| <b>1</b>                                |          | <b>2</b>                              |          |
|-----------------------------------------|----------|---------------------------------------|----------|
| Co1-O1                                  | 2.086(2) | Co1-O1                                | 2.068(3) |
| Co1-O(2)                                | 2.027(2) | Co1-O2                                | 2.022(3) |
| Co1-O4                                  | 2.051(2) | Co1-O4                                | 2.116(3) |
| Co1-O5                                  | 2.157(3) | Co1-O5                                | 2.140(3) |
| Co1-O4 <sup>a</sup>                     | 2.084(2) | Co1-O4 <sup>a</sup>                   | 2.052(3) |
| Co1-O4 <sup>b</sup>                     | 2.129(2) | Co1-O4 <sup>b</sup>                   | 2.081(2) |
| Co1-O4-Co1 <sup>b</sup>                 | 98.50(9) | Co1-O4-Co1 <sup>a</sup>               | 99.7(1)  |
| Co1-O4-Co1 <sup>c</sup>                 | 97.56(8) | Co1-O4-Co1 <sup>c</sup>               | 94.6(1)  |
| Co1 <sup>b</sup> -O4-Co(1) <sup>c</sup> | 95.16(8) | Co1 <sup>a</sup> -O4-Co1 <sup>c</sup> | 96.5(1)  |

Symmetry transformations used to generate equivalent atoms : for **1**, a:  $1/4-y, 1/4+x, 9/4-z$ ; b:  $-x, 1/2-y, z$ ; c:  $-1/4+y, 1/4-x, 9/4-z$ ; for **2**, a:  $5/2-x, 3/2-y, z$ ; b:  $1/2+y, 2-x, -z$ ; c:  $2-y, -1/2+x, -z$ .

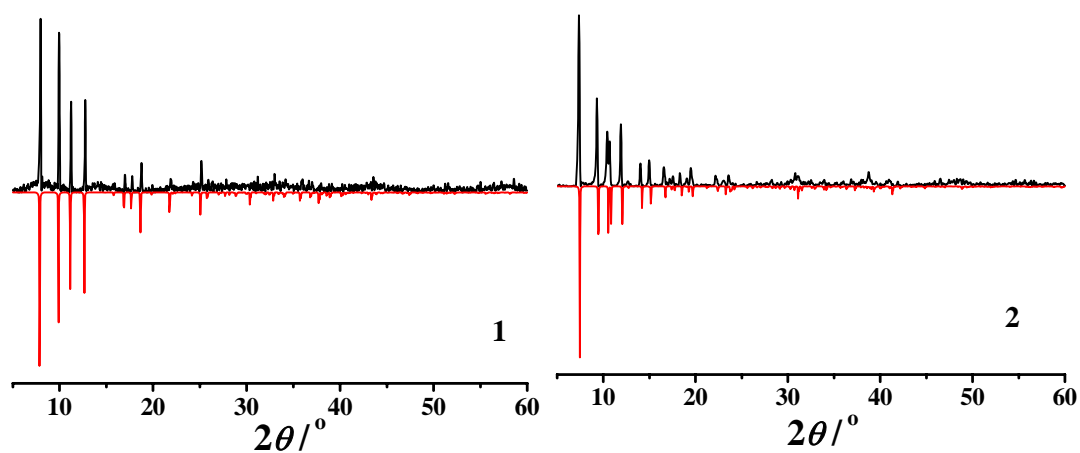

**Figure S2.** The experimental (black) powder X-ray diffraction and simulated patterns (red) of **1** and **2**.

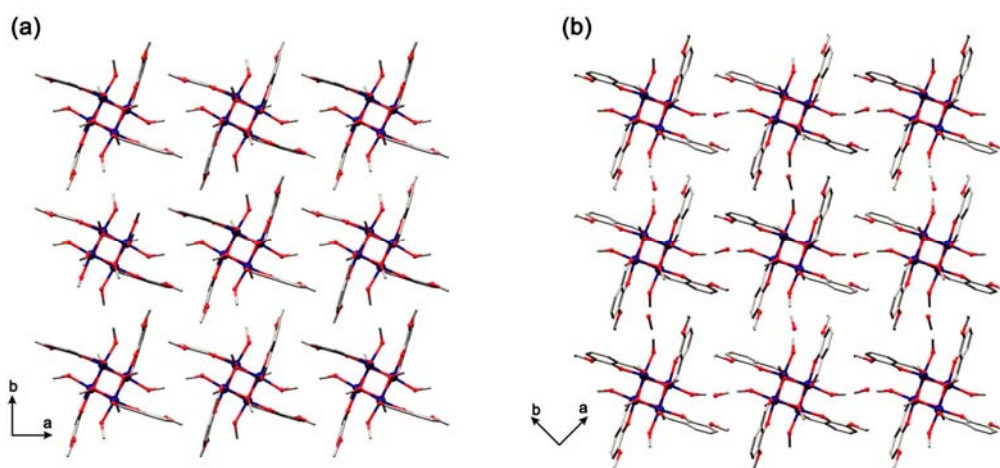

**Figure S3.** Packing of the molecules in **1** (a) and **2** (b) in the crystal viewed along c-axis within single plane.

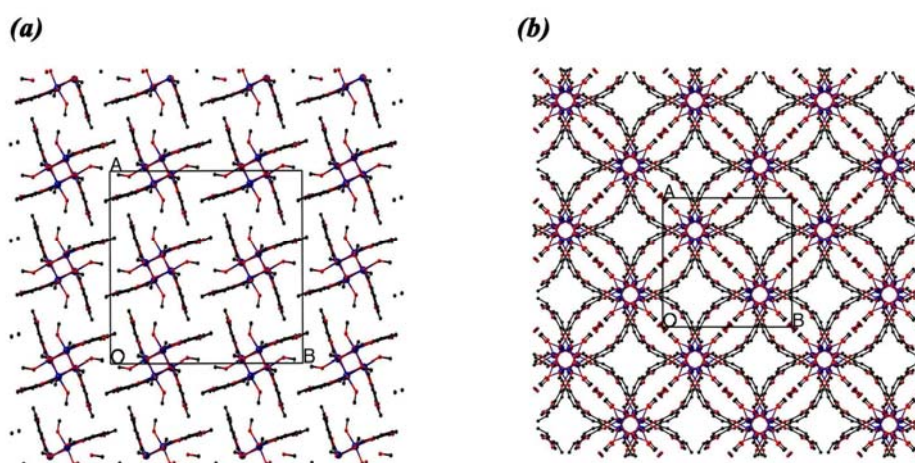

**Figure S4.** Packing of the molecules of **1** (a) and **2** (b) in the crystal viewed along c-axis for two overlapping planes.

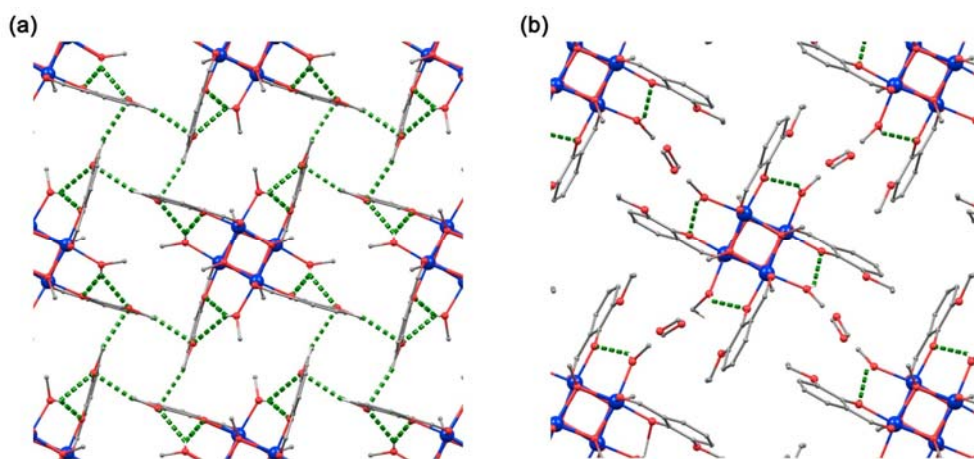

**Figure S5.** The intra- and inter-cluster H-bonding interactions of **1** and **2**.

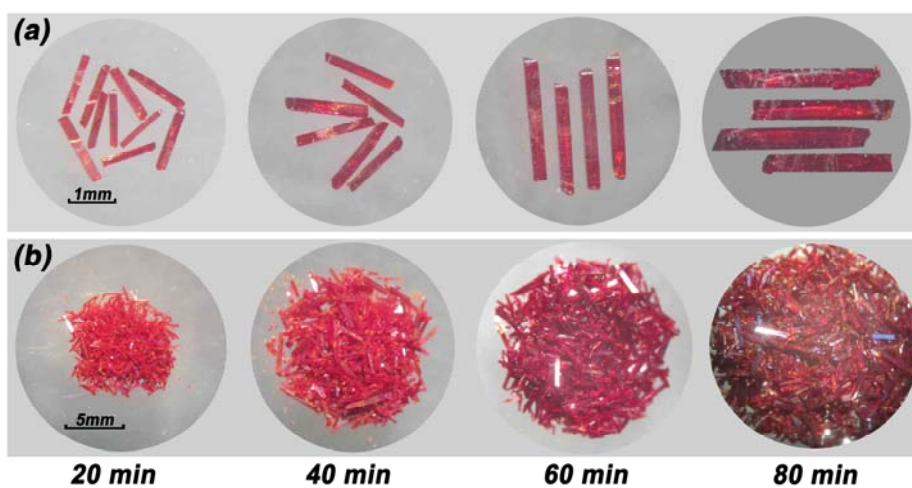

**Figure S6.** Photos of crystals of **1** for different reaction times by microwave assisted synthesis: (a): local views of single crystals for 20, 40, 60 and 80 min.; (b): total views of the products for 20, 40, 60 and 80 min.

| Peak Assignment                                                                                  | Observed $m/z$ | Calculated $m/z$ |
|--------------------------------------------------------------------------------------------------|----------------|------------------|
| $[\text{Co}(\text{hmb})(\text{OH})_3(\text{H}_2\text{O})_2+3\text{Na}^+]^+$                      | 365.99         | 365.97           |
| $[\text{Co}_2(\text{hmb})_2(\text{OH})_3(\text{H}_2\text{O})_3+2\text{Na}^+]^+$                  | 570.98         | 570.96           |
| $[\text{Co}_7(\text{hmb})_5(\text{CH}_3\text{O})_5(\text{OH})_2]^{2+}$                           | 678.41         | 678.41           |
| $[\text{Co}_7(\text{hmb})_5(\text{CH}_3\text{O})_6(\text{OH})]^{2+}$                             | 685.41         | 685.42           |
| $[\text{Co}_4(\text{hmb})_2(\text{OH})_5(\text{H}_2\text{O})_8]^+$                               | 766.87         | 766.91           |
| $[\text{Co}_4(\text{hmb})_3(\text{CH}_3\text{O})(\text{OH})_3]^+$                                | 770.87         | 770.87           |
| $[\text{Co}_4(\text{hmb})_3(\text{CH}_3\text{O})_2(\text{OH})_2]^+$                              | 784.89         | 784.89           |
| $[\text{Co}_4(\text{hmb})_3(\text{CH}_3\text{O})_3(\text{OH})]^+$                                | 798.90         | 798.90           |
| $[\text{Co}_4(\text{hmb})_3(\text{CH}_3\text{O})_4]^+$                                           | 812.92         | 812.92           |
| $[\text{Co}_3(\text{hmb})_4(\text{CH}_3\text{O})(\text{CH}_3\text{OH})_6(\text{H}_2\text{O})]^+$ | 1022.13        | 1022.14          |
| $[\text{Co}_3(\text{hmb})_4(\text{CH}_3\text{O})(\text{CH}_3\text{OH})_7]^+$                     | 1036.15        | 1036.15          |
| $[\text{Co}_5(\text{hmb})_4(\text{OH})_5(\text{H}_2\text{O})_8]^+$                               | 1127.89        | 1127.92          |
| $[\text{Co}_5(\text{hmb})_4(\text{OH})_5(\text{H}_2\text{O})_7(\text{CH}_3\text{OH})_2]^+$       | 1173.93        | 1173.96          |

**Table S2:** Details of major species assigned to the peaks in the ESI-MS spectrum of the methanol solution of **1**.

| Peak Assignment                                                                 | Observed $m/z$ | Calculated $m/z$ |
|---------------------------------------------------------------------------------|----------------|------------------|
| $[\text{Co}(\text{hmb})_2+\text{Na}^+]^+$                                       | 384.00         | 384.00           |
| $[\text{Co}(\text{hmb})(\text{CH}_3\text{OH})_7(\text{H}_2\text{O})_4]^+$       | 506.25         | 506.19           |
| $[\text{Co}_2(\text{hmb})_2(\text{OH})_3(\text{H}_2\text{O})_3+2\text{Na}^+]^+$ | 570.98         | 570.96           |
| $[\text{Co}_2(\text{hmb})_3(\text{CH}_3\text{OH})(\text{H}_2\text{O})_2]^+$     | 639.00         | 639.03           |
| $[\text{Co}_7(\text{hmb})_5(\text{OH})_7(\text{H}_2\text{O})_7]^{2+}$           | 706.40         | 706.41           |
| $[\text{Co}_7(\text{hmb})_6(\text{CH}_3\text{O})_3(\text{OH})_3]^{2+}$          | 731.41         | 731.41           |
| $[\text{Co}_7(\text{hmb})_6(\text{CH}_3\text{O})_4(\text{OH})_2]^{2+}$          | 738.42         | 738.42           |
| $[\text{Co}_7(\text{hmb})_6(\text{CH}_3\text{O})_5(\text{OH})]^{2+}$            | 745.43         | 745.43           |

**Table S3:** Details of major species assigned to the peaks in the ESI-MS spectrum of the ethanol solution of **1**.

| Peak Assignment                                                                                               | Observed $m/z$ | Calculated $m/z$ |
|---------------------------------------------------------------------------------------------------------------|----------------|------------------|
| $[\text{Co}(\text{heb})(\text{OH})_3(\text{H}_2\text{O})_2+3\text{Na}^+]^+$                                   | 380.01         | 379.99           |
| $[\text{Co}_2(\text{heb})(\text{CH}_3\text{O})_3(\text{OH})(\text{H}_2\text{O})+2\text{Na}^+]^+$              | 492.97         | 492.99           |
| $[\text{Co}_2(\text{heb})_3]^+$                                                                               | 613.02         | 613.03           |
| $[\text{Co}(\text{heb})_2(\text{CH}_3\text{O})(\text{CH}_3\text{OH})_2(\text{H}_2\text{O})_6+2\text{Na}^+]^+$ | 638.18         | 638.15           |
| $[\text{Co}_7(\text{heb})_6(\text{CH}_3\text{O})_4(\text{OH})_2]^{2+}$                                        | 780.47         | 780.47           |
| $[\text{Co}_7(\text{heb})_6(\text{CH}_3\text{O})_5(\text{OH})]^{2+}$                                          | 787.48         | 787.47           |
| $[\text{Co}_4(\text{heb})_3(\text{CH}_3\text{O})(\text{OH})_3]^+$                                             | 812.91         | 812.92           |
| $[\text{Co}_4(\text{heb})_3(\text{CH}_3\text{O})_2(\text{OH})_2]^+$                                           | 826.93         | 826.94           |
| $[\text{Co}_4(\text{heb})_3(\text{CH}_3\text{O})_3(\text{OH})]^+$                                             | 840.95         | 840.95           |
| $[\text{Co}_4(\text{heb})_3(\text{CH}_3\text{O})_4]^+$                                                        | 854.97         | 854.97           |
| $[\text{Co}_3(\text{heb})_4(\text{CH}_3\text{O})(\text{CH}_3\text{OH})_4(\text{H}_2\text{O})_3]^+$            | 1050.16        | 1050.17          |
| $[\text{Co}_3(\text{heb})_4(\text{CH}_3\text{O})(\text{CH}_3\text{OH})_5(\text{H}_2\text{O})_2]^+$            | 1064.18        | 1064.19          |
| $[\text{Co}_3(\text{heb})_4(\text{CH}_3\text{O})(\text{CH}_3\text{OH})_6(\text{H}_2\text{O})]^+$              | 1078.20        | 1078.20          |
| $[\text{Co}_3(\text{heb})_4(\text{CH}_3\text{O})(\text{CH}_3\text{OH})_7]^+$                                  | 1092.21        | 1092.22          |

**Table S4.** Details of major species assigned to the peaks in the ESI-MS spectrum of the methanol solution of **2**.

| Peak Assignment                                                                                               | Observed $m/z$ | Calculated $m/z$ |
|---------------------------------------------------------------------------------------------------------------|----------------|------------------|
| $[\text{Co}_2(\text{heb})_3]^+$                                                                               | 613.02         | 613.03           |
| $[\text{Co}(\text{heb})_2(\text{CH}_3\text{O})(\text{CH}_3\text{OH})_2(\text{H}_2\text{O})_6+2\text{Na}^+]^+$ | 638.18         | 638.15           |
| $[\text{Co}_7(\text{heb})_6(\text{CH}_3\text{O})_3(\text{OH})_3]^{2+}$                                        | 773.45         | 773.46           |
| $[\text{Co}_7(\text{heb})_6(\text{CH}_3\text{O})_4(\text{OH})_2]^{2+}$                                        | 780.47         | 780.47           |
| $[\text{Co}_7(\text{heb})_6(\text{CH}_3\text{O})_5(\text{OH})]^{2+}$                                          | 787.48         | 787.47           |
| $[\text{Co}_4(\text{heb})_3(\text{CH}_3\text{O})_4]^+$                                                        | 854.97         | 854.97           |
| $[\text{Co}_4(\text{heb})_3(\text{CH}_3\text{O})_2(\text{CH}_3\text{CH}_2\text{O})_2]^+$                      | 883.00         | 883.00           |
| $[\text{Co}_4(\text{heb})_4(\text{CH}_3\text{O})_2(\text{OH})]^+$                                             | 974.98         | 974.99           |

|                                                                                                                                                       |         |         |
|-------------------------------------------------------------------------------------------------------------------------------------------------------|---------|---------|
| $[\text{Co}_4(\text{heb})_4(\text{CH}_3\text{O})_2(\text{CH}_3\text{CH}_2\text{O})]^+$                                                                | 1003.02 | 1003.02 |
| $[\text{Co}_3(\text{heb})_4(\text{CH}_3\text{CH}_2\text{O})(\text{CH}_3\text{OH})_2$<br>$-(\text{CH}_3\text{CH}_2\text{OH})(\text{H}_2\text{O})_4]^+$ | 1064.19 | 1064.19 |
| $[\text{Co}_3(\text{heb})_4(\text{CH}_3\text{CH}_2\text{O})(\text{CH}_3\text{OH})_5(\text{H}_2\text{O})_2]^+$                                         | 1078.21 | 1078.20 |
| $[\text{Co}_3(\text{heb})_4(\text{CH}_3\text{O})(\text{CH}_3\text{OH})_7]^+$                                                                          | 1092.21 | 1092.22 |

**Table S5.** Details of major species assigned to the peaks in the ESI-MS spectrum of the ethanol solution of **2**.

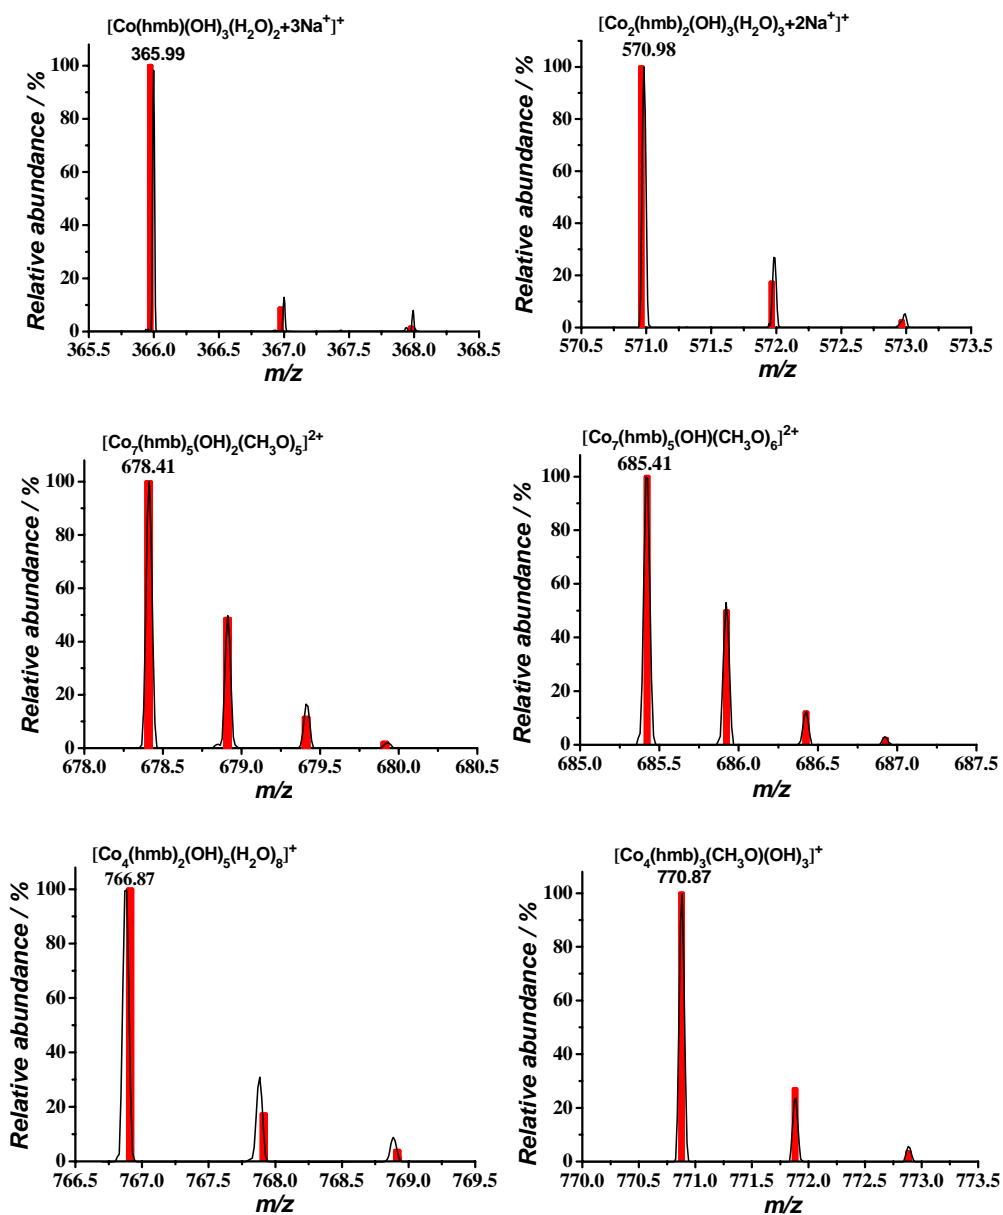

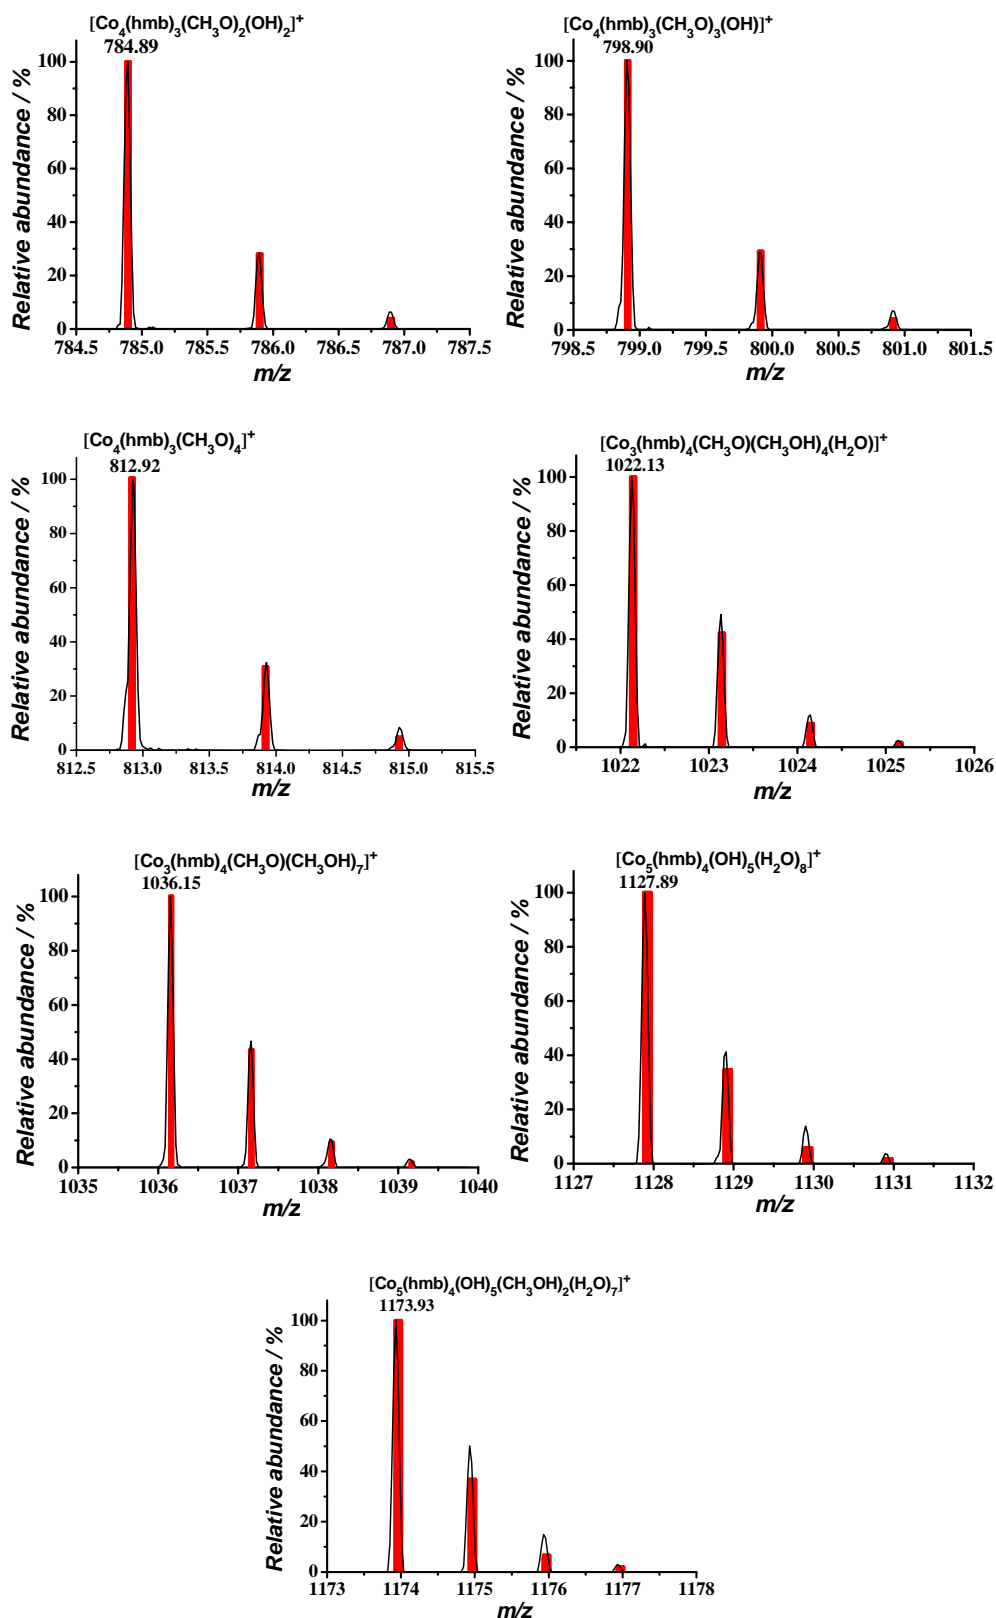

**Figure S7.** Representation of the calculated peaks fit experimental species present in the ESI-MS spectrum of the methanol solution of **1**. Red bars correspond to the simulated data and black lines correspond to the experimental data.



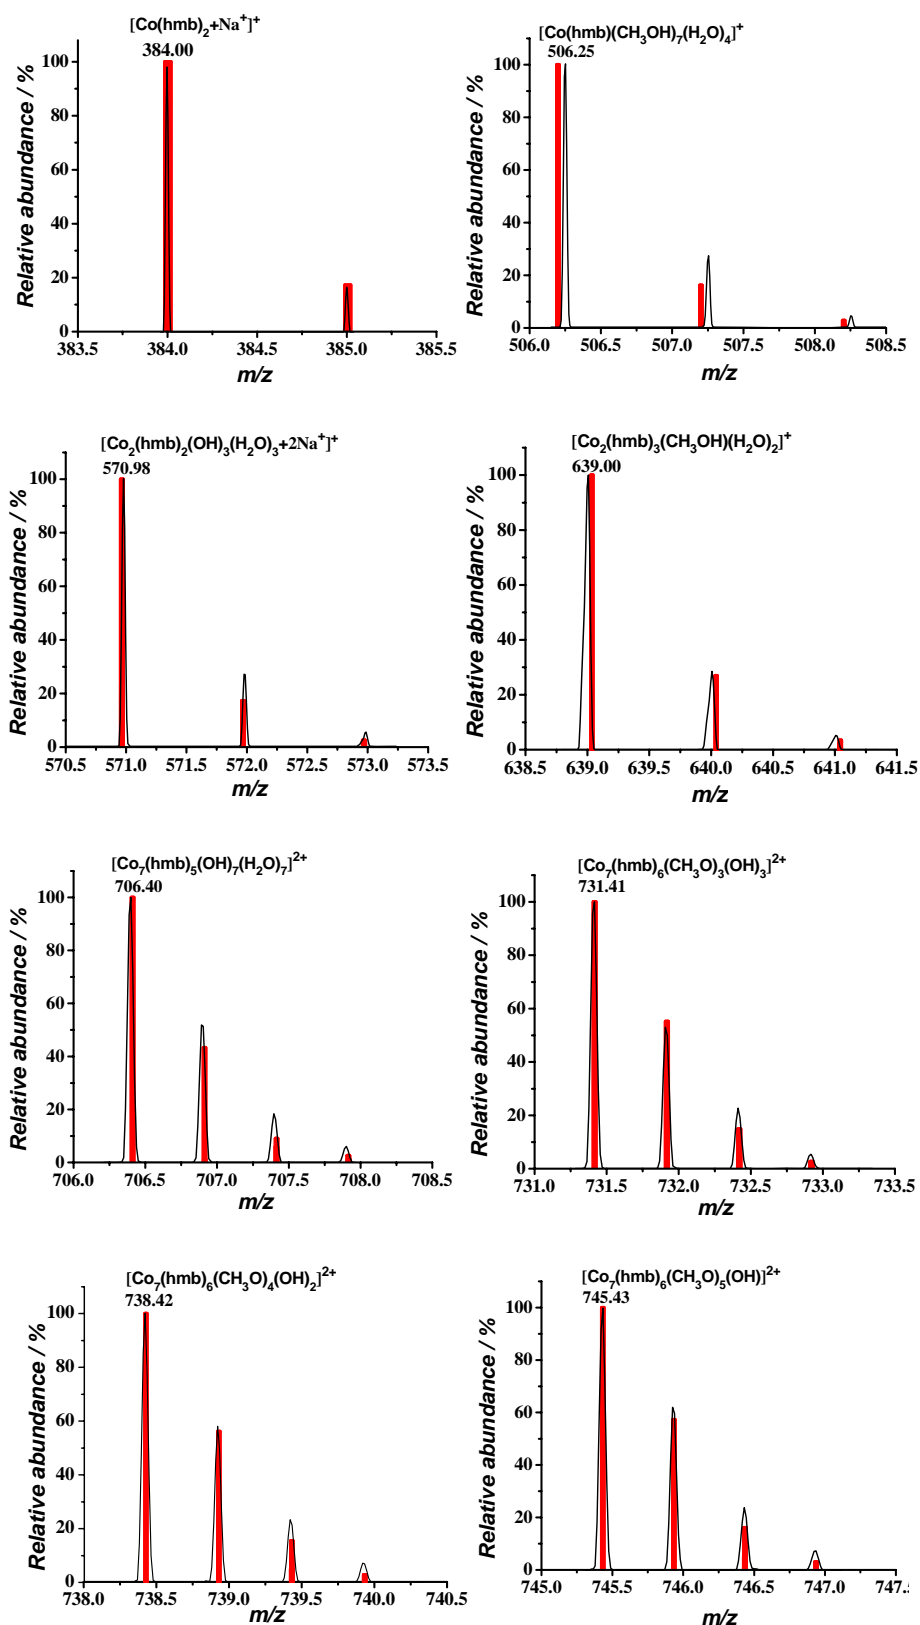

**Figure S8.** Representation of the calculated peaks fit experimental species present in the ESI-MS spectrum of the ethanol solution of **1**. Red bars correspond to the simulated data and black lines correspond to the experimental data.

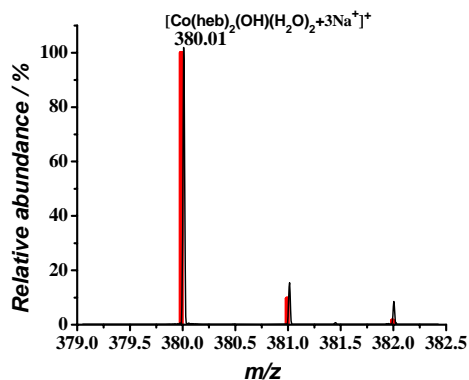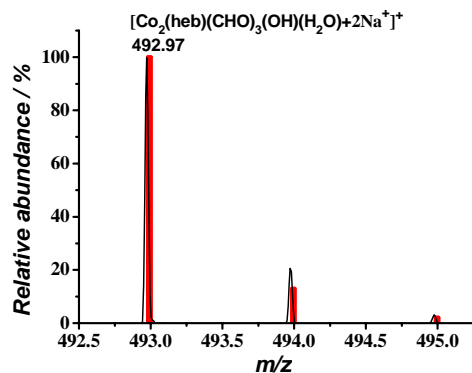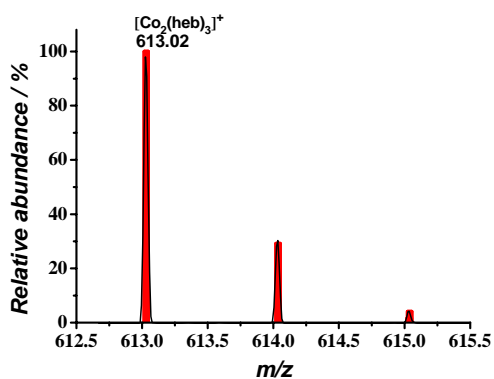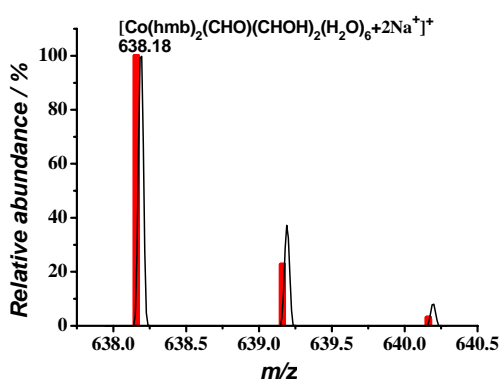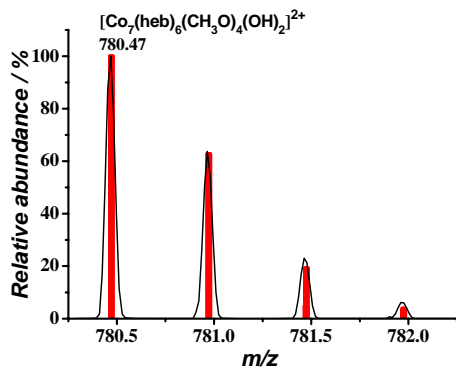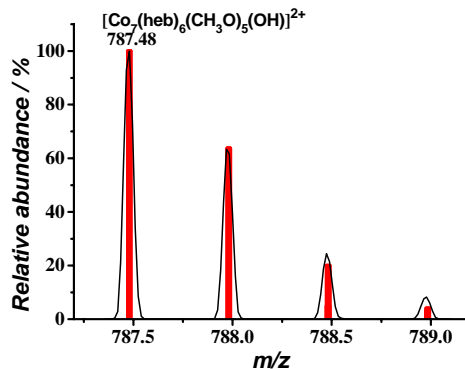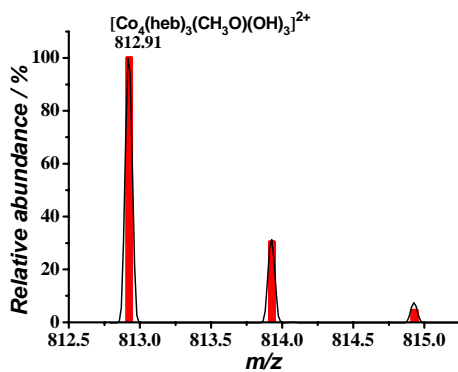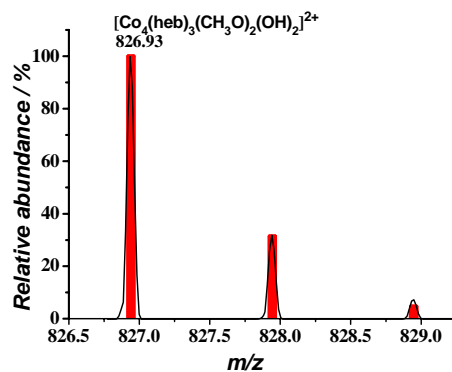

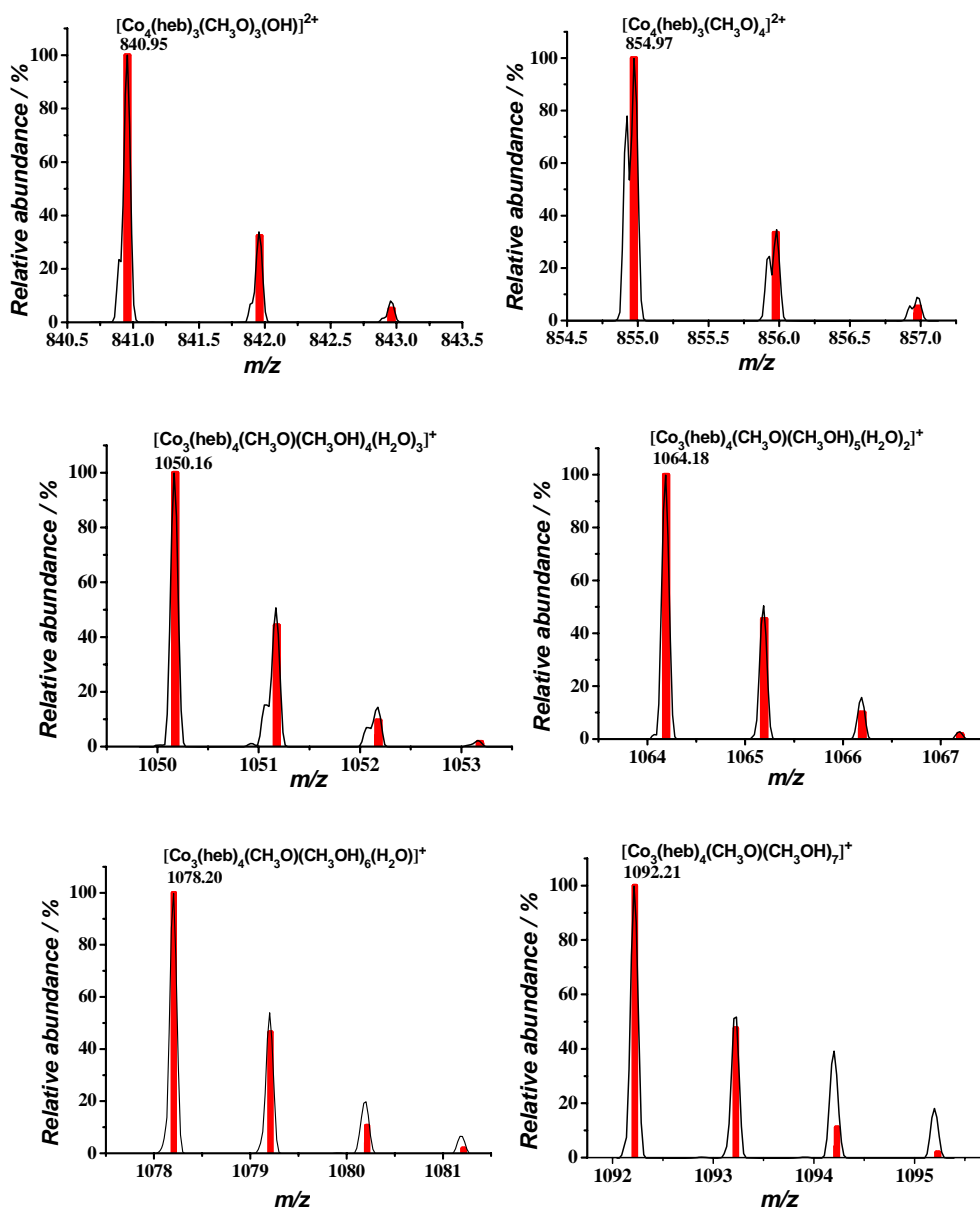

**Figure S9.** Representation of the calculated peaks fit experimental species present in the ESI-MS spectrum of the methanol solution of **2**. Red bars correspond to the simulated data and black lines correspond to the experimental data.

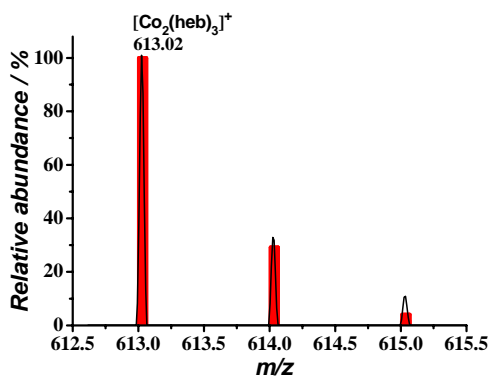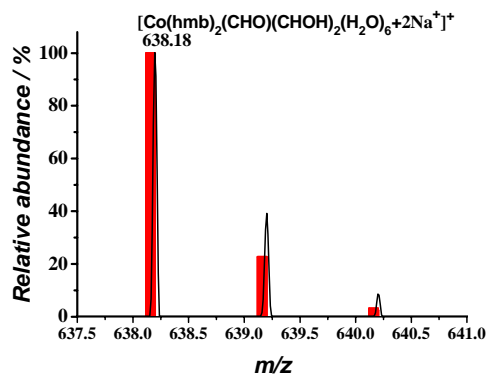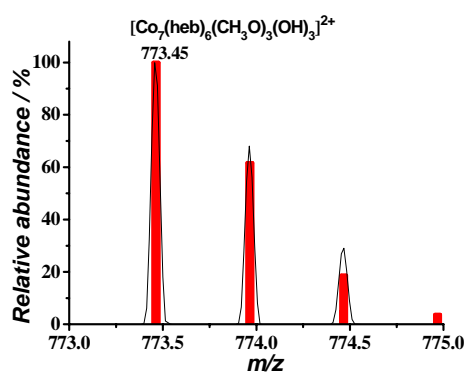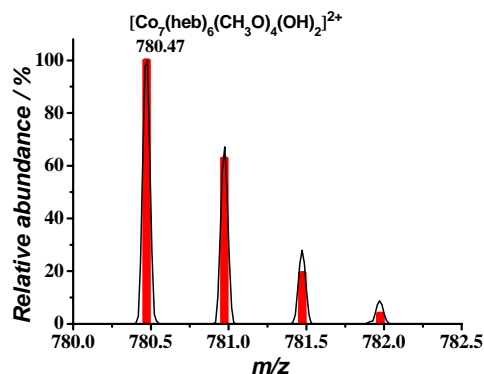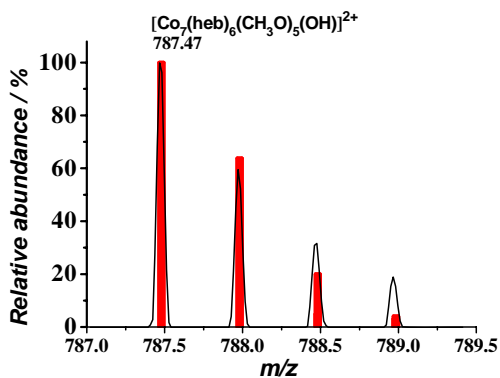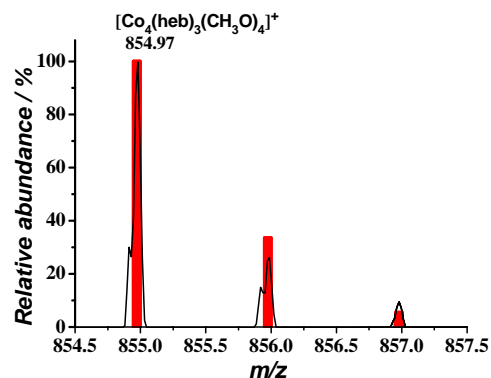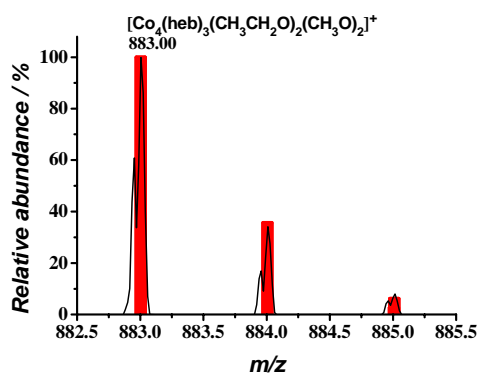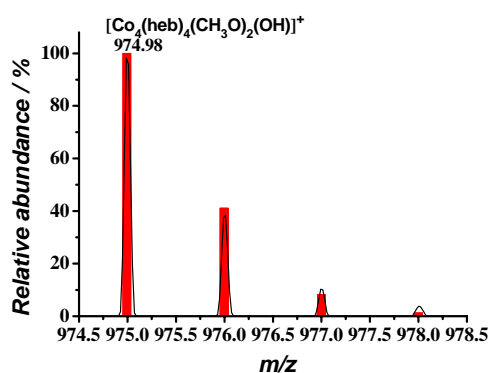

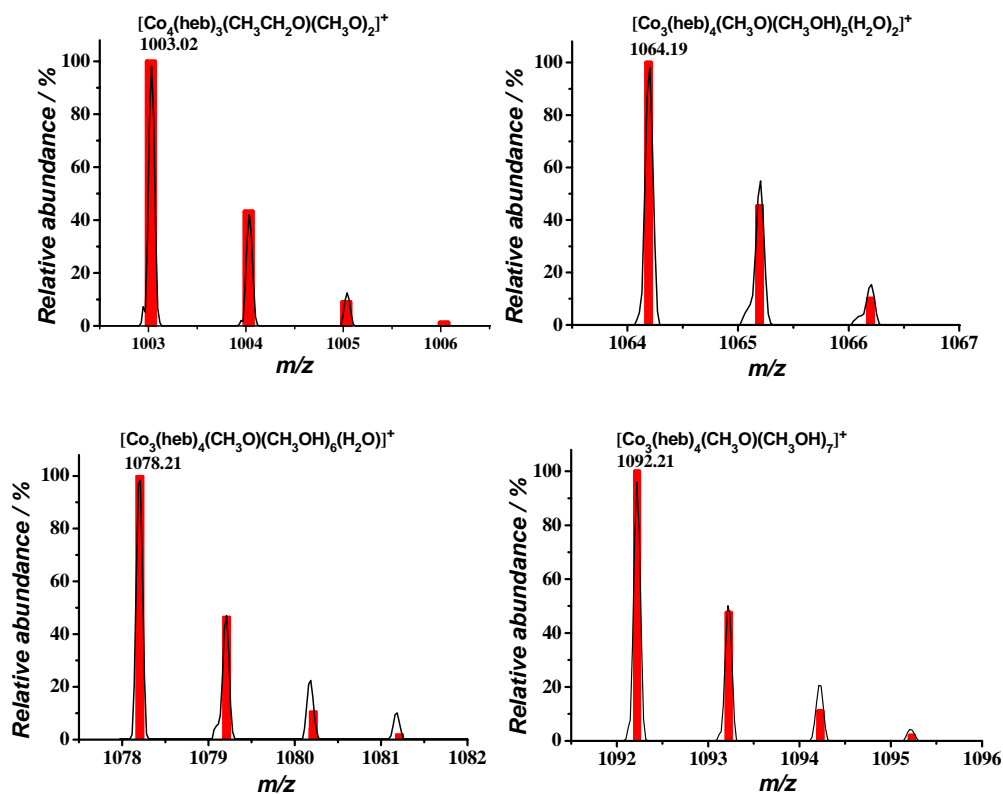

**Figure S10.** Representation of the calculated peaks fit experimental species present in the ESI-MS spectrum of the ethanol solution of **2**. Red bars correspond to the simulated data and black lines correspond to the experimental data.

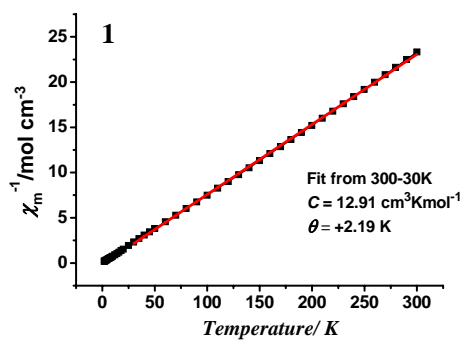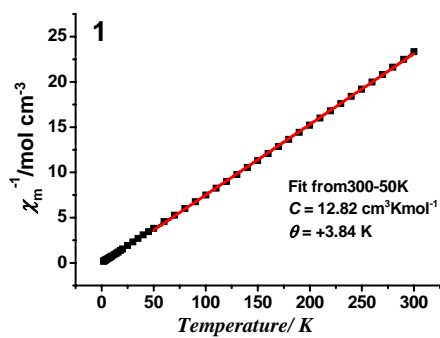

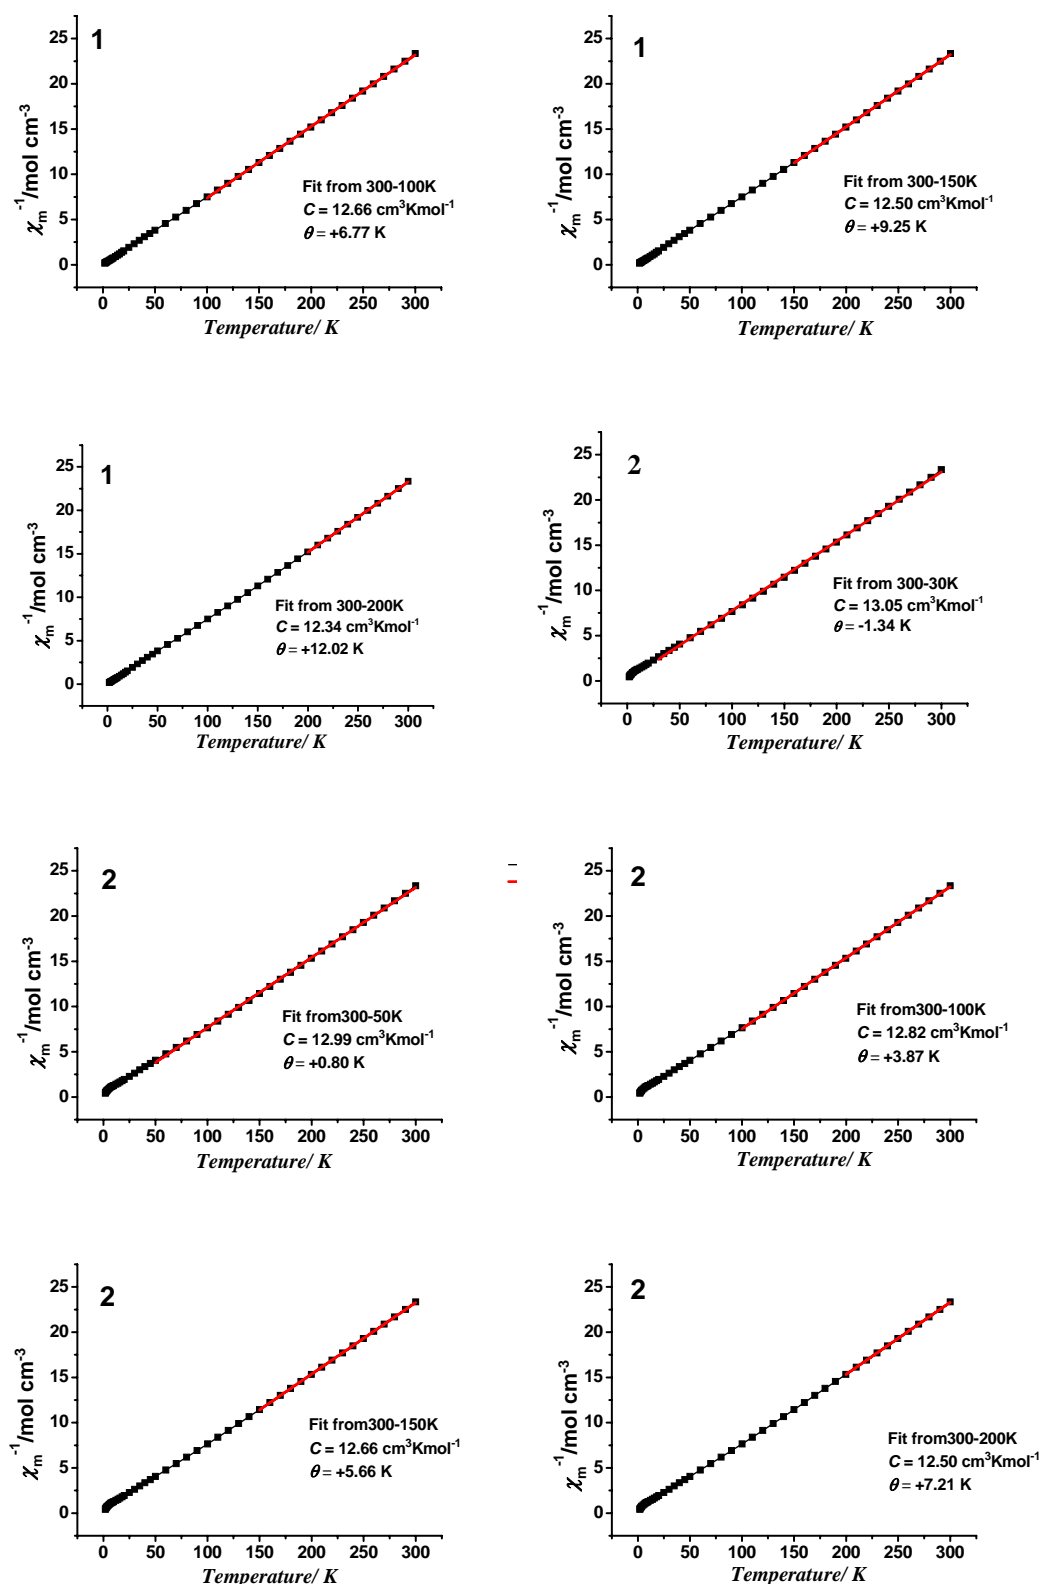

**Figure S11.** Plots of  $\chi_m^{-1}$  vs.  $T$  and the fit of Curie-Weiss law (red curve) of **1** and **2** on the different ranges of temperatures.

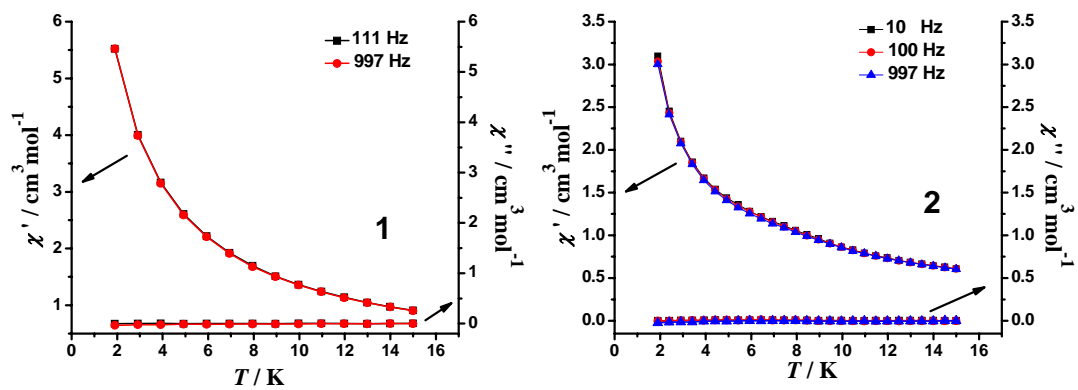

**Figure 12.** Plots of in-phase ( $\chi'$ ) and out-of-phase ( $\chi''$ ) ac susceptibilities for **1** and **2**.
